# Supplementary material for: Higher Age (≥60 Years) Increases the Risk for Adverse Events during Autologous Hematopoietic Stem Cell Transplantation
Source: MDPI journal article supplement (doi:10.3390/cancers15051584), 2023-03-03
Supplement: s1 [file s1]

Supplemental materials

Table S1

Table S1. AEs, n=120.

| Subcategory         | Reported AEs                                             | n= | % of total AEs | Part of the process: |            |                 |
|---------------------|----------------------------------------------------------|----|----------------|----------------------|------------|-----------------|
|                     |                                                          |    |                | Collection           | Processing | Transplantation |
| Administration      | data/ planning related issue                             | 11 | 9              | 1                    | 9          | 1               |
|                     | laboratory/ technical issue                              | 1  | 1              |                      | 1          |                 |
| AR*                 | cardiovascular                                           | 9  | 8              |                      |            | 9 (4)           |
|                     | gastrointestinal                                         | 7  | 6              |                      |            | 7 (3)           |
|                     | allergic/ respiratory                                    | 7  | 6              |                      |            | 7 (5)           |
|                     | neurological                                             | 5  | 4              |                      |            | 5 (2)           |
|                     | fever                                                    | 4  | 3              |                      |            | 4               |
| Material            | damaged bag                                              | 8  | 7              |                      | 8 (8)      |                 |
|                     | laboratory/ technical issue                              | 1  | 1              |                      | 1 (1)      |                 |
| Procedure           | time delay                                               | 10 | 9              |                      |            | 10 (4)          |
|                     | data/ planning related issue                             | 2  | 2              |                      | 2          |                 |
|                     | laboratory/ technical issue                              | 1  | 1              |                      | 1 (1)      |                 |
| Quality             | cell loss over limit                                     | 16 | 13             |                      | 16 (1)     |                 |
|                     | insufficient collection                                  | 14 | 12             | 14                   |            |                 |
|                     | positive initial bacterial/fungal culture, not confirmed | 8  | 7              | 3                    | 5          |                 |
|                     | laboratory/ technical issue                              | 6  | 5              |                      | 6 (4)      |                 |
|                     | data/ planning related issue                             | 3  | 3              | 1                    | 2          |                 |
| Non-patient related | issues affecting several transplants such as             |    |                |                      |            |                 |
|                     | device failure                                           | 6  | 5              |                      |            |                 |
|                     | human error                                              | 4  | 3              |                      |            |                 |
|                     | material                                                 | 1  | 1              |                      |            |                 |

\* 32 ARs in 28 patients; (number of serious AEs)

Supplemental materials

Table S2

**Table S2.** Collection, processing and transplantation characteristics according to reported AEs and age at transplantation. Data without the CD34+-selected transplants.

| Variables                                                                        | Transplantations<br>wAE<60<br>n=30 | Transplantations<br>wAE≥60<br>n=49 | Transplantations<br>woAE<60<br>n=183 | Transplantations<br>woAE≥60<br>n=166 |
|----------------------------------------------------------------------------------|------------------------------------|------------------------------------|--------------------------------------|--------------------------------------|
| Collection and processing                                                        |                                    |                                    |                                      |                                      |
| • Total volume collected [ml] <sup>1,2</sup>                                     | 416.5/ 198-586                     | 346/ 156-700                       | 262.5/ 89-573                        | 284/ 126-568                         |
| • Lc in transplant product [×10 <sup>9</sup> /L] <sup>1,2</sup>                  | 201.7/ 192.0-224.8                 | 199.3/ 146.4-218.6                 | 199.7/ 128.1-311.8                   | 200.6/ 152.5-430.6                   |
| • MNC in transplant product [×10 <sup>9</sup> /L] <sup>1,2</sup>                 | 104.9/ 60.9-173.5                  | 114.8/ 52.8-161.4                  | 115.8/ 28.7-186.0                    | 112.7/ 36.3-231.2                    |
| • PNC in transplant product [×10 <sup>9</sup> /L] <sup>1,2</sup>                 | 96.3/ 30.4-151.1                   | 83.3/ 37.3-153.3                   | 81.8/ 22.0-198.7                     | 88.3/ 22.9-199.5                     |
| • Total CD34+ cells in transplant product [×10 <sup>6</sup> /kg BW] <sup>1</sup> | 7.5/ 2.1-13.7                      | 5.7/ 2.1-18.4                      | 10.9/ 2.0-29.6                       | 7.1/ 1.5-21.5                        |
| Transplantation                                                                  |                                    |                                    |                                      |                                      |
| • Age of patients at transplantation [yrs] <sup>1</sup>                          | 54.5/ 24-59                        | 67.0/ 60-75                        | 49.0/ 19-59                          | 65.0/ 60-79                          |
| • Volume infused [ml] <sup>1</sup>                                               | 300/ 80-1650                       | 320/ 70-1680                       | 160/ 40-1380                         | 240/ 40-1440                         |
| • Volume of DMSO infused [ml] <sup>1</sup>                                       | 15.0/ 4.0-82.5                     | 16.0/ 3.5-84.0                     | 8.0/ 2.0-69.0                        | 12.0/ 2.0-72.0                       |
| • Neutrophil recovery [days] <sup>1,3,5</sup>                                    | 11/ 10-17                          | 12/ 0-20                           | 11/ 1-32                             | 11/ 0-19                             |
| • Platelet recovery [days] <sup>1,4,6</sup>                                      | 13/ 11-137                         | 15/ 0-138                          | 13/ 10-108                           | 14/ 0-105                            |
| • Body temperature ≥38.5°C [yes/no/n.a. (% of total)]                            | 26/ 3/ 1 (87)                      | 45/ 4/ 0 (92)                      | 172/ 10/ 1 (94)                      | 158/ 8/ 0 (95)                       |
| • Duration of hospitalization [days] <sup>1</sup>                                | 19/ 16-34                          | 23/ 1-71                           | 20/ 1-65                             | 22/ 1-48                             |

1: median/ range; 2: at 1<sup>st</sup> apheresis; 3: patients who never reached the values were excluded, n=3; 4: patients who never reached the value were excluded, n=7; 5: >0.5 ×10<sup>9</sup>/L; 6: >20 ×10<sup>9</sup>/L; n.a. not available

**Table S3.** Collection, processing and transplantation characteristics according to the number of AEs reported at transplantation. Data without the CD34+-selected transplants.

| Variables                                                                        | Transplantations<br>woAE<br>n=349 | Transplantations<br>w1AE<br>n=63 | Transplantations<br>w≥2AE<br>n=16 |
|----------------------------------------------------------------------------------|-----------------------------------|----------------------------------|-----------------------------------|
| Collection and processing                                                        |                                   |                                  |                                   |
| • Total volume collected [ml] <sup>1,2</sup>                                     | 273/ 89-573                       | 343.5/ 156-700                   | 412.5/ 275-452                    |
| • Lc in transplant product [×10 <sup>9</sup> /L] <sup>1,2</sup>                  | 200.0/ 128.1-430.6                | 201.5/ 146.4-214.5               | 200.1/ 192.0-224.8                |
| • MNC in transplant product [×10 <sup>9</sup> /L] <sup>1,2</sup>                 | 115.2/ 28.7-231.2                 | 109.6/ 52.8-173.5                | 109.8/ 60.9-140.5                 |
| • PNC in transplant product [×10 <sup>9</sup> /L] <sup>1,2</sup>                 | 85.9/ 22.0-199.5                  | 88.0/ 30.4-153.3                 | 93.0/ 57.0-151.1                  |
| • Total CD34+ cells in transplant product [×10 <sup>6</sup> /kg BW] <sup>1</sup> | 9.6/ 1.5-29.6                     | 6.5/ 2.1-18.4                    | 5.1/ 2.1-9.8                      |
| Transplantation                                                                  |                                   |                                  |                                   |
| • Age of patients at transplantation [yrs] <sup>1</sup>                          | 58/ 19-79                         | 62/ 30-75                        | 65/ 24-71                         |
| • Volume infused [ml] <sup>1</sup>                                               | 180/ 40-1440                      | 300/ 70-1680                     | 500/ 180-1650                     |
| • Volume of DMSO infused [ml] <sup>1</sup>                                       | 9.0/ 2.0-72.0                     | 15.0/ 3.5-84.0                   | 25.0/ 9.0-82.5                    |
| • Neutrophil recovery [days] <sup>1,3,5</sup>                                    | 11/ 0-32                          | 11.5/ 0-20                       | 12/ 11-20                         |
| • Platelet recovery [days] <sup>1,4,6</sup>                                      | 14/ 0-10                          | 14.5/ 0-60                       | 24.5/ 11-138                      |
| • Body temperature ≥38.5°C [yes/no/n.a. (% of total)]                            | 330/ 18/ 1 (95)                   | 56/ 6/ 1 (89)                    | 15/ 1/ 0 (94)                     |
| • Duration of hospitalization [days] <sup>1</sup>                                | 21/ 1-65                          | 22/ 2-71                         | 22/ 1-61                          |

1: median/ range; 2: at 1<sup>st</sup> apheresis; 3: patients who never reached the values were excluded, n=3; 4: patients who never reached the value were excluded, n=7; 5: >0.5 ×10<sup>9</sup>/L; 6: >20 ×10<sup>9</sup>/L; n.a. not available
